# Supplementary material
Source: publisher site journal article supplement (https://www.dovepress.com/article/494385)
Supplement: Supplementary file 1 [file get_supplementary_file.php]

Supplementary table 1 Spearman correlation analysis between Dmin value and other index (*rho*)

| Variable | Correlation coefficient | *P* value |
| --- | --- | --- |
| Age, years | -0.003 | 0.989 |
| BMI, kg/m2 | -0.302 | 0.098 |
| Eosinophilic count, cells/μL | 0.175 | 0.414 |
| Percentage of eosinophils (%) | 0.247 | 0.244 |
| IgE (13 patients), IU/mL | -0.115 | 0.707 |
| FeNO (18 patients), ppb | -0.195 | 0.437 |
| FEV1 (L) | -0.192 | 0.301 |
| FEV1, % predicted | 0.195 | 0.294 |
| FVC (L) | -0.242 | 0.190 |
| FVC, % predicted | -0.097 | 0.602 |
| FEV1/FVC (%) | 0.418 | 0.019 |
| PEF, % predicted | 0.174 | 0.349 |
| FEF25%, % predicted | 0.157 | 0.399 |
| FEF50%, % predicted | 0.330 | 0.070 |
| FEF25%-75%, % predicted | 0.391 | 0.029 |
| FEF75%, % predicted | 0.406 | 0.024 |

Abbreviations: BMI, body mass index; AR, allergic rhinitis; IgE, immunoglobulin E; FeNO, fractional exhaled nitric oxide; FEV1, forced expiratory volume in 1 second; FVC, forced vital capacity; PEF, peak expiratory flow; FEF25%, FEF at 25% of FVC exhaled; FEF50%, FEF at 50% of FVC exhaled; FEF25%~75%, FEF at 25% to 75% of FVC; FEF75%, FEF at 75% of FVC exhaled.
